# Supplementary material for: Neurturin regulates the lung-resident macrophage inflammatory response to viral infection
Source: Life Sci Alliance. 2020 Oct 5;3(12):e202000780. doi: 10.26508/lsa.202000780 (PMC7556752; doi:10.26508/lsa.202000780)
Supplement: Supplementary file 2 [file LSA-2020-00780_SdataF1.xlsx]

## Sheet: Fig1A
Fig 1A
	GFRa1	GFRa2	GFRa3	GFRa4	RET	GDNF	Nrtn	Artn	Pspn
	0.160468	25.6364	0.132269	0.012676	0.519896	0.278545	0.254315	2.57377	2.97351
	0.183778	30.7585	0.536848	0.007897	0.437422	0.270128	1.98293	2.24054	1.96148
	0.333491	15.8693	0.149912	0.007964	0.130065	0.129825	0.091504	1.4906	2.39831

## Sheet: Fig1B
Fig 1B	Monocytes			MDMs
	GFRa2	RET	Nrtn	GFRa2	RET	Nrtn
	97.359	0.634031	0.004621	44.9061	1.77858	0.096774
	126.01	0.822031	0.021536	62.3337	1.32538	0.044305
	68.1955	0.129333	0.162658	41.744	1.33629	0.001792
				15.8745	1.36465	0.064166
				31.4234	4.15858	0.115393

## Sheet: Fig1D
Fig 1D

## Sheet: Fig1E
Fig 1E
	UT	IL-4	IL-10	IL-13	IFNy	PolyI:C	LPS	R848
	1.13803	0.481782	1.9381	0.738271	0.738271	972.08	27.107	16.2697
	0.892256	0.661483	1.55845	1.0408	1.0408	423.094	5.27762	5.8525
	0.984817	0.23271	1.11933	0.433469	0.433469	429.493	3.6221	5.76279

## Sheet: Fig1F
Fig 1F
	GFRa1	GFRa2	GFRa3	GFRa4	RET	GDNF	Nrtn	Artn	Pspn
	10.4248	0.956099	0.478275	0.000846848	0.579399	0.0451379	2.54059	1.75152	0.607695
	8.83791	1.10274	0.509027	0.00561371	1.28053	0.0152589	4.38469	1.86202	1.3587
	11.8769	1.09758	0.387925	0.000713956	0.525471	0.02302	1.77704	1.38922	0.494282

## Sheet: Fig1G
Fig 1G
	UT	PolyI:C	LPS	R848	IFNa	IFNb
	1.18962	1.73475	1.95237	1.56532	1.3711	1.35659
	1.0953	1.80288	1.896	1.12654	1.50858	1.46426
	0.819521	1.78146	1.64153	0.919777	1.08451	0.924186
