# Supplementary material for: Neurturin regulates the lung-resident macrophage inflammatory response to viral infection
Source: Life Sci Alliance. 2020 Oct 5;3(12):e202000780. doi: 10.26508/lsa.202000780 (PMC7556752; doi:10.26508/lsa.202000780)
Supplement: Supplementary file 3 [file LSA-2020-00780_SdataFS2.xlsx]

## Sheet: FigS2A
FigS2A
	GDNF	Nrtn	Artn	Pspn
	2.42862	4.42335	9.11362	1.19897
	2.94869	12.1873	8.98076	3.16286
	0.692837	8.32278	5.03262	1.3339

## Sheet: FigS2B
FigS2B
	GFRα1	GFRα2	GFRα3	GFRα4	RET
	209.68	0.189389	1.75289	0.000901	0.069882
	236.989	0.60853	3.53811	0.001403	0.178499
	53.2053	0.1819	1.52557	0.009182	0.135804

## Sheet: FigS2C
FigS2C	Influenza d.p.i
	0	8	11	14	21	42
	1.57906	2.08215	1.26833	0.274913	0.28862	0.342268
	0.807718	1.77177	0.648949	0.278817	0.138893	0.269869
	0.463809	2.16839	0.599237	0.386851	0.229567	0.319446
	0.920084	2.75537	1.2409	0.454171	0.173301	0.346156
