# Supplementary material for: Neurturin regulates the lung-resident macrophage inflammatory response to viral infection
Source: Life Sci Alliance. 2020 Oct 5;3(12):e202000780. doi: 10.26508/lsa.202000780 (PMC7556752; doi:10.26508/lsa.202000780)
Supplement: Supplementary file 5 [file LSA-2020-00780_SdataF2.xlsx]

## Sheet: Fig2A
Fig2A
	UT	PolyI:C	BX795	PolyI:C+ BX795
	1.12689	16.7306	0	0
	1.16317	11.3401	0	0
	0	12.3192	0	0

## Sheet: Fig2B
Fig2B
	UT	PolyI:C	BX795	PolyI:C + BX795
	1	6912.28	13.1881	6.74179
	1	63.8426	1.51993	0.434482
	1	216.657	10.2285	3.08648
	1	93.2408	39.877	18.1361
	1	526.737	0.62602	9.58516
	1	1814.7	3.91298	12.7056

## Sheet: Fig2C
Fig2C
	UT	PolyI:C	BX795	PolyI:C + BX795
	1	8.56489	0.438713	0.916786
	1	1.71415	0.423005	0.206726
	1	23.1537	0.930814	0.163231
	1	1.94318	0.634348	0.999672
	1	1.67659	0.984474	0.470462
	1	5.51218	0.392455	0.576441

## Sheet: Fig2D
Fig2D
	UT	IFN	IFN	IFN	IFN
	1.68109	10.7268	21.9134	0.613331	3.40967
	1.41441	19.6155	50.6743	0.821763	6.6448
	0.420566	21.042	37.14	0.197562	16.077

## Sheet: Fig2E
Fig2E
	UT	IFN	IFN	IFN	IFN
	1.55449	39.346	124.43	0.600561	1.92747
	1.30896	55.0934	149.001	0.521709	0.709559
	0.491458	27.8209	85.8595	2.32962	0.277292

## Sheet: Fig2F
Fig2F
	UT	IFN	IFN	IFN	IFN
	0.511707	79.0928	70.8445	0.607502	0.88177
	1.34579	106.591	258.441	0.229629	0.78834
	1.45212	71.4586	126.543	4.23311	0.363318

## Sheet: Fig2G
Fig2G

## Sheet: Fig2H
Fig2H
	UT	20 IFN	100 IFN
	1.84549	2.54603	2.65754
	1.77021	1.31207	1.22241
	3.10792	3.59457	3.06814

## Sheet: Fig2I
Fig2I
	UT	20 IFN	100 IFN
	0.112535	1.55064	4.17195
	0.160768	1.74163	1.57443
	0.023056	1.56322	2.1017
