# Supplementary material for: Neurturin regulates the lung-resident macrophage inflammatory response to viral infection
Source: Life Sci Alliance. 2020 Oct 5;3(12):e202000780. doi: 10.26508/lsa.202000780 (PMC7556752; doi:10.26508/lsa.202000780)
Supplement: Supplementary file 6 [file LSA-2020-00780_SdataFS4.xlsx]

## Sheet: FigS4A
FigS4A
	FCGR3B	LTB4R	NOX1	NPY2R	TNFRSF18	F2RL1	IL12B	NPY1R	SIPR1
	2.36723	2.61208	3.29254	2.07801	2.09536	-2.66069	-2.28913	-2.54171	-4.23335

## Sheet: FigS4B
FigS4B
	CD16b	CXCL8	CXCL9	IFNB1	IGF1	IL-6	SIPR1	FCGR1B
	6.27232	209.964	711.145	44.1395	5.15152	9.74053	7.97231	-8.06123

## Sheet: FigS4C
FigS4C
	FCG1RA	MMP2	IFNγ	IL-6	IL-12A	MAPK	MMP9
	2.78099	16.4795	-3.18523	-7.95797	-3.81425	-2.33173	-2.22283

## Sheet: FigS4D
FigS4D

## Sheet: FigS4E
FigS4E
	UT	PolyI:C	IFNβ	Nrtn	PolyI:C + Nrtn	IFNβ + Nrtn
	0.283383	0	0.005933	0.349621	0.01469	0.007894
	0.584084	0.293471	0	0.462877	0.221014	0
	1.31631	1.09234	0.010515	1.07383	0.885013	0.008824

## Sheet: FigS4F
FigS4F
	UT	PolyI:C	IFNα/β	Nrtn	PolyI:C + Nrtn	IFNα/β + Nrtn
	107.589	30.5592	19.5405	59.5831	27.5249	11.1821
	89.4899	109.028	25.335	213.274	111.083	19.3598
	116.38	54.3873	8.31497	51.1084	31.7461	6.81543
