# Supplementary material for: Neurturin regulates the lung-resident macrophage inflammatory response to viral infection
Source: Life Sci Alliance. 2020 Oct 5;3(12):e202000780. doi: 10.26508/lsa.202000780 (PMC7556752; doi:10.26508/lsa.202000780)
Supplement: Supplementary file 9 [file LSA-2020-00780_SdataF5.xlsx]

## Sheet: Fig5A
Fig5A
	UT	Nrtn	PolyI:C	PolyI:C + Nrtn	IFNβ	IFNβ + Nrtn
	0.155376	0.142015	38.8811	21.0541	0.359408	0.327209
	0.191253	0.187246	48.172	29.6925	0.628886	0.574675
	0.109123	0.093744	38.7679	23.2187	0.236811	0.222856
	0.242705	0.188756	49.8406	30.753	0.320091	0.290875

## Sheet: Fig5B
Fig5B
	UT	Nrtn	PolyI:C	PolyI:C + Nrtn	IFNβ	IFNβ + Nrtn
	224.699	209.781	821.428	537.135	135.199	191.434
	240.871	192.585	494.395	295.421	196.57	148.772
	222.524	186.733	562.2	452.921	167.8	121.519
	174.757	112.422	764.188	487.474	144.759	107.324

## Sheet: Fig5C
Fig5C
	UT	Nrtn	PolyI:C	PolyI:C + Nrtn	IFNβ	IFNβ + Nrtn
	0.05445	0.05085	6.29256	7.41512	0.144354	0.141953
	0.023403	0.021279	9.3446	8.55524	0.078501	0.071905
	0.030375	0.03065	8.94262	10.2418	0.049038	0.048797
	0.169299	0.075843	16.5445	14.8934	0.135858	0.138349

## Sheet: Fig5D
Fig5D
	UT	Nrtn	PolyI:C	PolyI:C + Nrtn	IFNα/β	IFNa/b + Nrtn
	32.7323	37.1845	1117.16	617.758	25.1477	25.8229
	25.4849	27.1821	1353.45	1017.04	31.5033	35.3921
	24.1409	21.8194	1429.85	2146.13	23.9737	23.4735
	25.3162	19.3782	1534.72	1575.87	23.1411	22.3135
