# Supplementary material for: Neurturin regulates the lung-resident macrophage inflammatory response to viral infection
Source: Life Sci Alliance. 2020 Oct 5;3(12):e202000780. doi: 10.26508/lsa.202000780 (PMC7556752; doi:10.26508/lsa.202000780)
Supplement: Supplementary file 10 [file LSA-2020-00780_SdataF6.xlsx]

## Sheet: Fig6A
Fig6A
	Control	COPD
	40.3955	10.5893
	60.6237	65.3292
	30.728	21.8594
	41.2526	24.7842
	51.4652	18.3633
	35.2679	8.01594
	30.3521	28.4858
	46.5429	83.5506
	32.2471	62.0463
	330.713	98.0459
	15.14	97.1216
	68.2328	39.6394
	71.7591	175.907
		96.2387
		37.681
		103.39
		61.9503
		310.8

## Sheet: Fig6B
Fig6B
	Control	COPD
	2.46222	1.97731
	0.576647	2.53453
	0.811748	0.749783
	4.70987	1.872
	2.96944	0.033144
	1.14555	0.054251
	0.358755	0.50463
	0.109585	0.069124
	0.041667	1.28212
	2.2694	0.700645
	1.41467	3.47538
	0.815643	8.01072
	4.252	0.877602
		3.42941
		1.80218
		1.26207
		0.033752
		1.5962

## Sheet: Fig6C
Fig6C
	Control	COPD
	39.855	4.2822
	19.0483	1.81633
	39.3626	2.98267
	30.2768	15.7198
	27.6402	32.7744
	6.21114	20.9152
	7.1533	75.7376
	4.29888	137.697
	223.305	247.457
	23.6946	25.3512
	141.714	164.315
	30.3032
	36.2032
	100.399
	150.695
	67.6904
	12.6027

## Sheet: Fig6D
Fig6D
	Non- smoker	Smoker
	40.3955	32.2471
	60.6237	330.713
	30.728	15.14
	41.2526	68.2328
	51.4652	71.7591
	35.2679	62.0463
	30.3521	98.0459
	46.5429	97.1216
	10.5893	39.6394
	65.3292	175.907
	21.8594	96.2387
	24.7842	37.681
	18.3633	103.39
	8.01594	61.9503
	28.4858	310.8
	83.5506

## Sheet: Fig6E
Fig6E
	Non- smoker	Smoker
	2.46222	0.041667
	0.576647	2.2694
	0.811748	1.41467
	4.70987	0.815643
	2.96944	4.252
	1.14555	1.28212
	0.358755	0.700645
	0.109585	3.47538
	1.97731	8.01072
	2.53453	0.877602
	0.749783	3.42941
	1.872	1.80218
	0.033144	1.26207
	0.054251	0.033752
	0.50463	1.5962
	0.069124

## Sheet: Fig6F
Fig6F
	Non- smoker	Smoker
	39.855	150.695
	19.0483	67.6904
	39.3626	20.9152
	30.2768	75.7376
	27.6402	137.697
	6.21114	247.457
	7.1533	25.3512
	4.29888	164.315
	223.305
	23.6946
	141.714
	30.3032
	36.2032
	100.399
	4.2822
	12.6027
	1.81633
	2.98267
	15.7198
	32.7744

## Sheet: Fig6G
Fig6G
	Healthy margin	Tumour
	3.65	11.23
	4.79734	8.56
	4.4184	2.65466
	10.6282	2.31469

## Sheet: Fig6H
Fig6H
	Healthy margin	Tumour
	0.2356	0.61
	0.4329	0.98
	0.0736	0.7108
	0.9659	2.0578
